**Table S1. Rescue of the lethality of *sec3* mutants by wild-type *sec3* transgene**

|                                     |                                                                                                                         |                                                                                                                             |
|-------------------------------------|-------------------------------------------------------------------------------------------------------------------------|-----------------------------------------------------------------------------------------------------------------------------|
| Experiment                          | Actin-GAL4/Cyo;<br><i>sec3</i> <sup>GT</sup> /TM6B,Tb<br>X UAS- <i>sec3</i> /Cyo;<br><i>sec3</i> <sup>GT</sup> /TM6B,Tb | Actin-GAL4/Cyo;<br><i>sec3</i> <sup>PBac</sup> /TM6B,Tb<br>X UAS- <i>sec3</i> /Cyo;<br><i>sec3</i> <sup>PBac</sup> /TM6B,Tb |
| Number of total progeny             | 182                                                                                                                     | 169                                                                                                                         |
| Number of homozygous mutant progeny | 6                                                                                                                       | 24                                                                                                                          |
| Rescue efficiency                   | 23%                                                                                                                     | 100%                                                                                                                        |

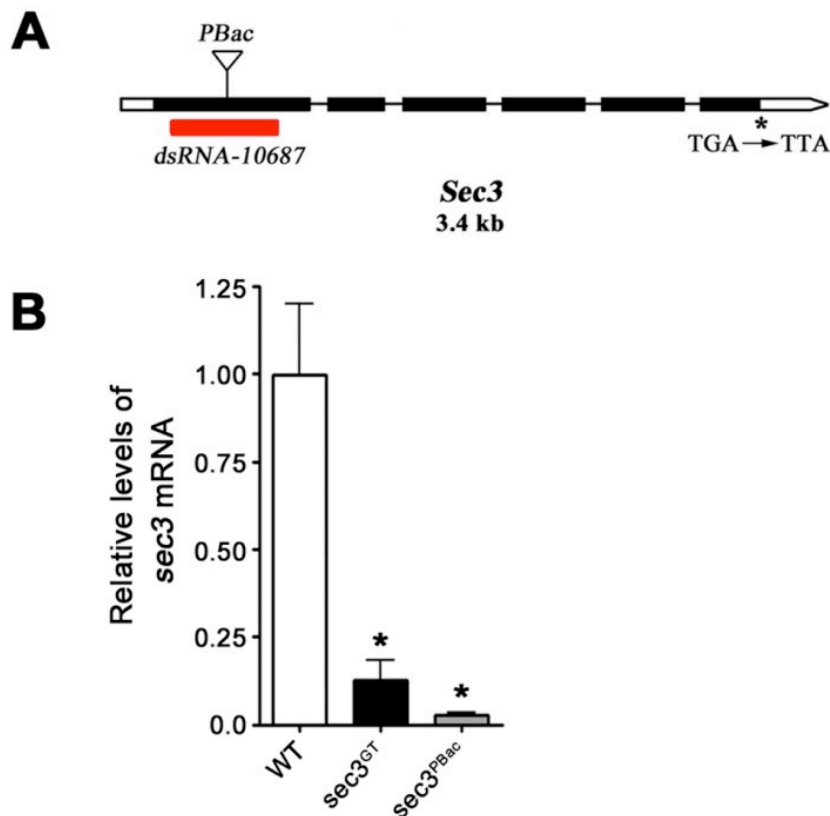

**Figure S1. Characterization of the *sec3* mutations.** (A), Gene structure and mutant alleles of *sec3*. Black boxes represent the CDS, and white boxes represent untranslated regions. The red box represents the target sequence region of RNAi. *sec3*<sup>PBac</sup> is a mutation with *piggyBac* transposon inserted in the first exon of the gene. *sec3*<sup>GT</sup> is a point mutation in stop codon. (B), The RNA levels of *sec3* is reduced in *sec3* mutants compared with the wild type flies. Experiments were repeated independently three times with consistent results and three replicates were used per time point.

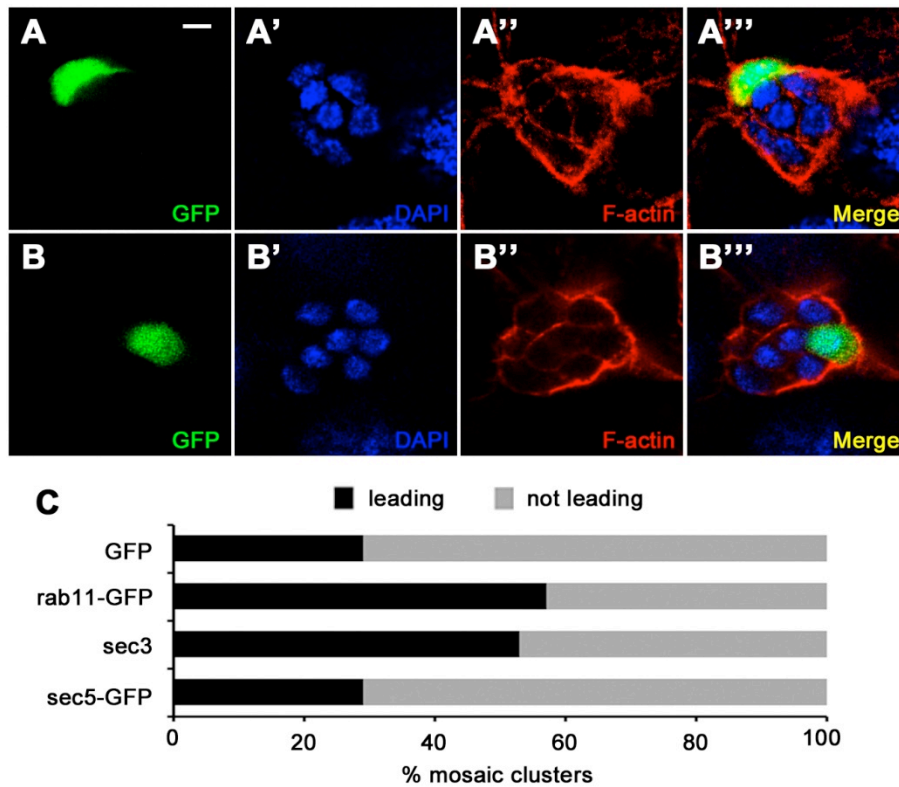

**Figure S2. Local increase in Sec3 or Rab11-GFP level in single border cell (BC) biases it to become leading cell for BC cluster.** (A-A''') An example of mosaic clusters containing 1-cell clone expressing *UAS-GFP* at the non-leading position. (B-B''') An example of mosaic clusters containing 1-cell clone expressing *UAS-sec3* at the leading position. (C) Cells in clones expressing only the GFP marker became leading cells in 29% of mosaic clusters (n=100), whereas cells expressing Sec3 and Rab11-GFP lead in 53% (n=45) and 57% (n=76) of mosaic clusters, respectively. Expressing Sec5-GFP does not change the frequency of BC becoming leading cell (n=51). Scale bar: 5 $\mu$ m.

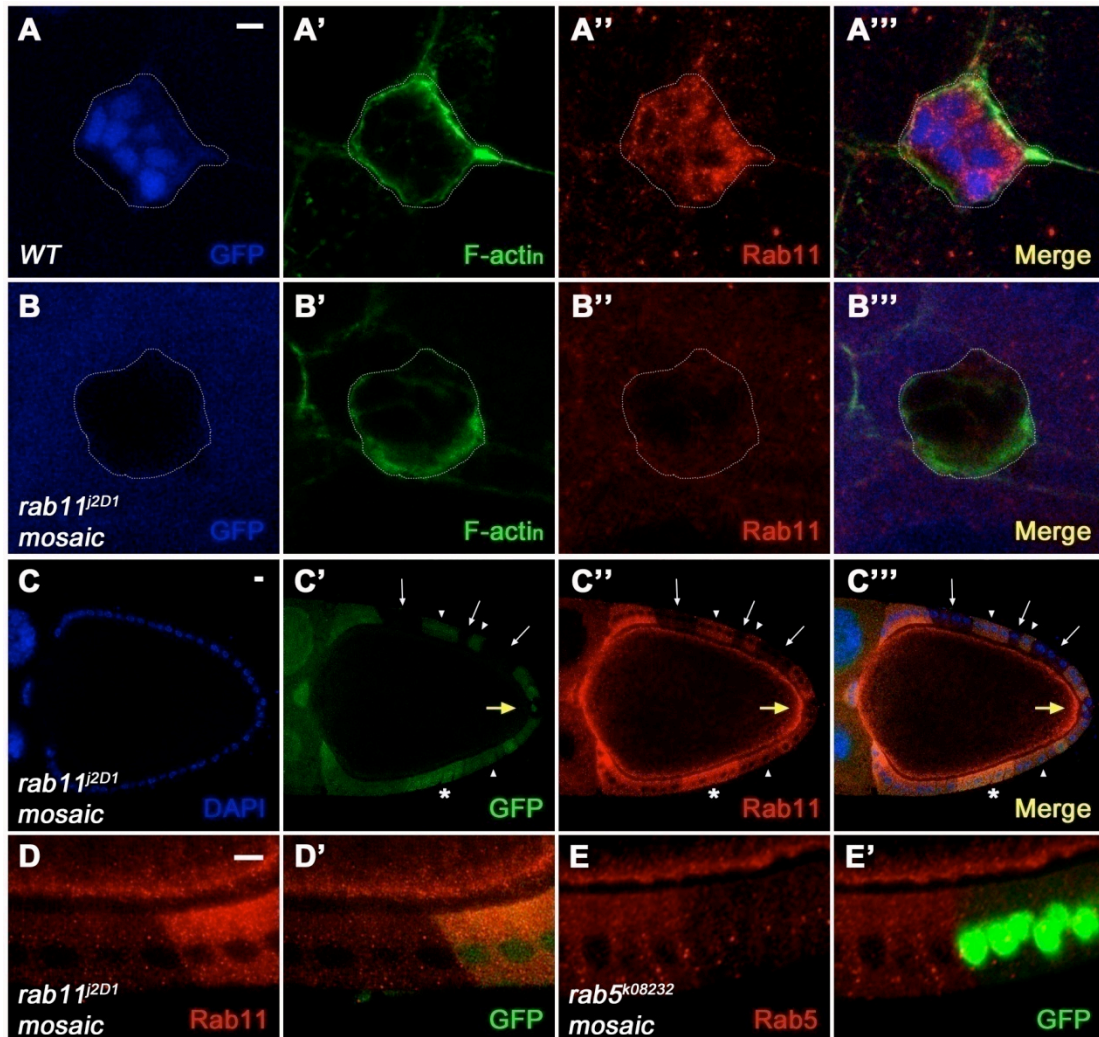

**Figure S3. The specificity of Rab11 and Rab5 antibodies.** (A-A''') The Rab11 staining in wild type BCs. (B-B''') Rab11 signal is strongly reduced in *rab11<sup>j2D1</sup>* (Jankovics et al., 2001; Alone et al., 2005) BCs. Mutant cells are marked by absence of GFP. (C-C''') Rab11 signal is strongly reduced in *rab11<sup>j2D1</sup>* follicle cells (FCs). White arrow shows homozygous mutant cells, arrowhead shows heterozygous cells, \* shows wild type cells. Yellow arrow shows specific accumulation of Rab11 at the posterior pole of oocyte as previously reported (Dollar et al., 2002). (D-D'), High magnification view of Rab11 staining in one of the mutant clones shown in (C-C'''). (E-E') Rab5 signal is markedly reduced in a *rab5<sup>k08232</sup>* (Wucherpennig et al., 2003) FC clone. Mutant cells are positively marked by GFP. Scale bar: 5µm.

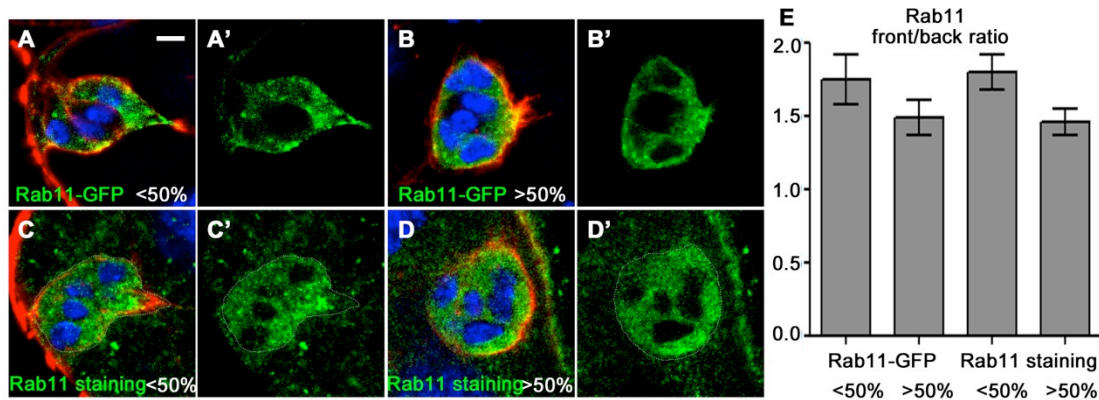

**Figure S4. Rab11-GFP is polarized during border cell migration.** (A-B'), Representative images showing the distribution of Rab11-GFP at 0%-50% and 50%-100% of the migration process respectively. Blue shows DAPI, red shows F-actin. (C-D') Representative images showing the distribution of Rab11 antibody staining signal at 0%-50% and 50%-100% of the migration process. (E) Fluorescence intensity was measured for Rab11-GFP or Rab11 antibody staining signals in both front[F(F)] and back[F(B)] regions of BC clusters, and the values were used to calculate the F(F)/F(B) ratios ( $8 < n < 16$ ). Error bars indicate s.e.m. Scale bar: 5 $\mu$ m.

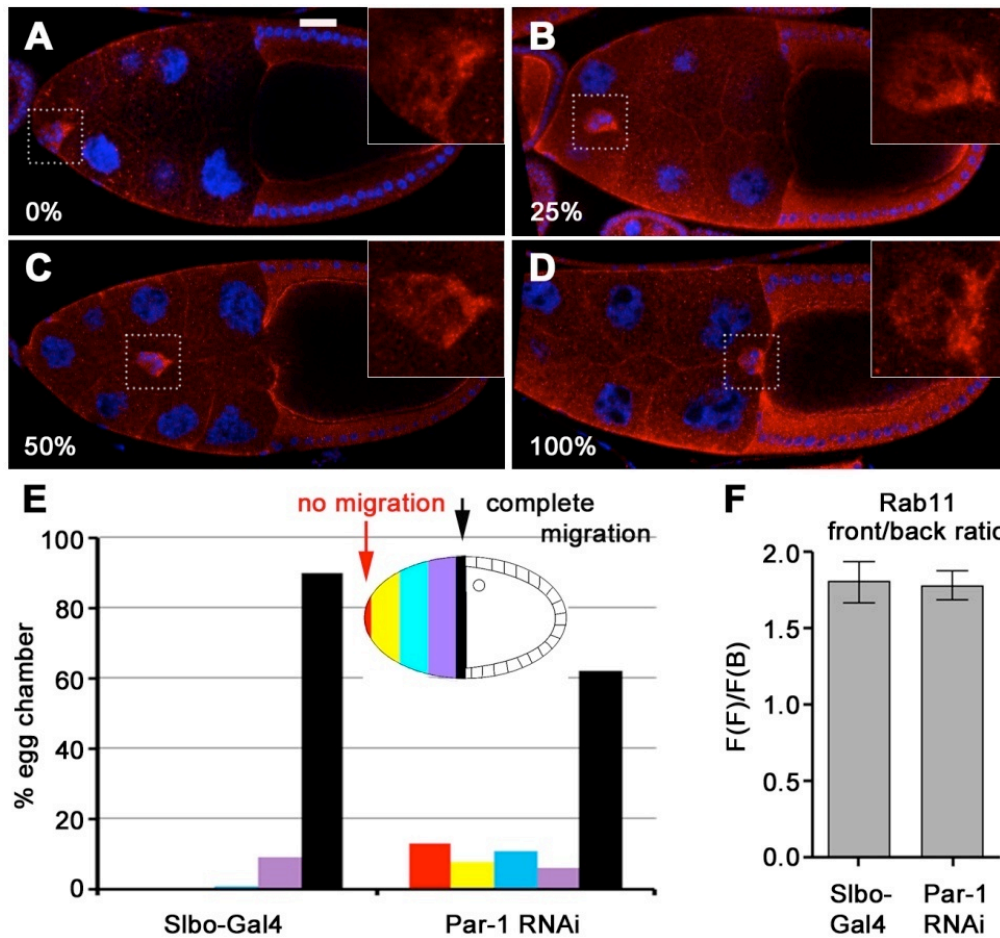

**Figure S5. Expression of *Par-1* RNAi delays BC migration but does not affect Rab11 polarity.** (A-D) Representative images of BC clusters with migration defects or with normal migration all show Rab11 polarity. (E) Quantification of BC migration defects in control or in egg chambers expressing *Par-1* RNAi driven by *Slbo*-GAL4 (n>80). (F) Quantification of Rab11 front/back ratio. Error bars indicate s.e.m. Scale bar: 20um.

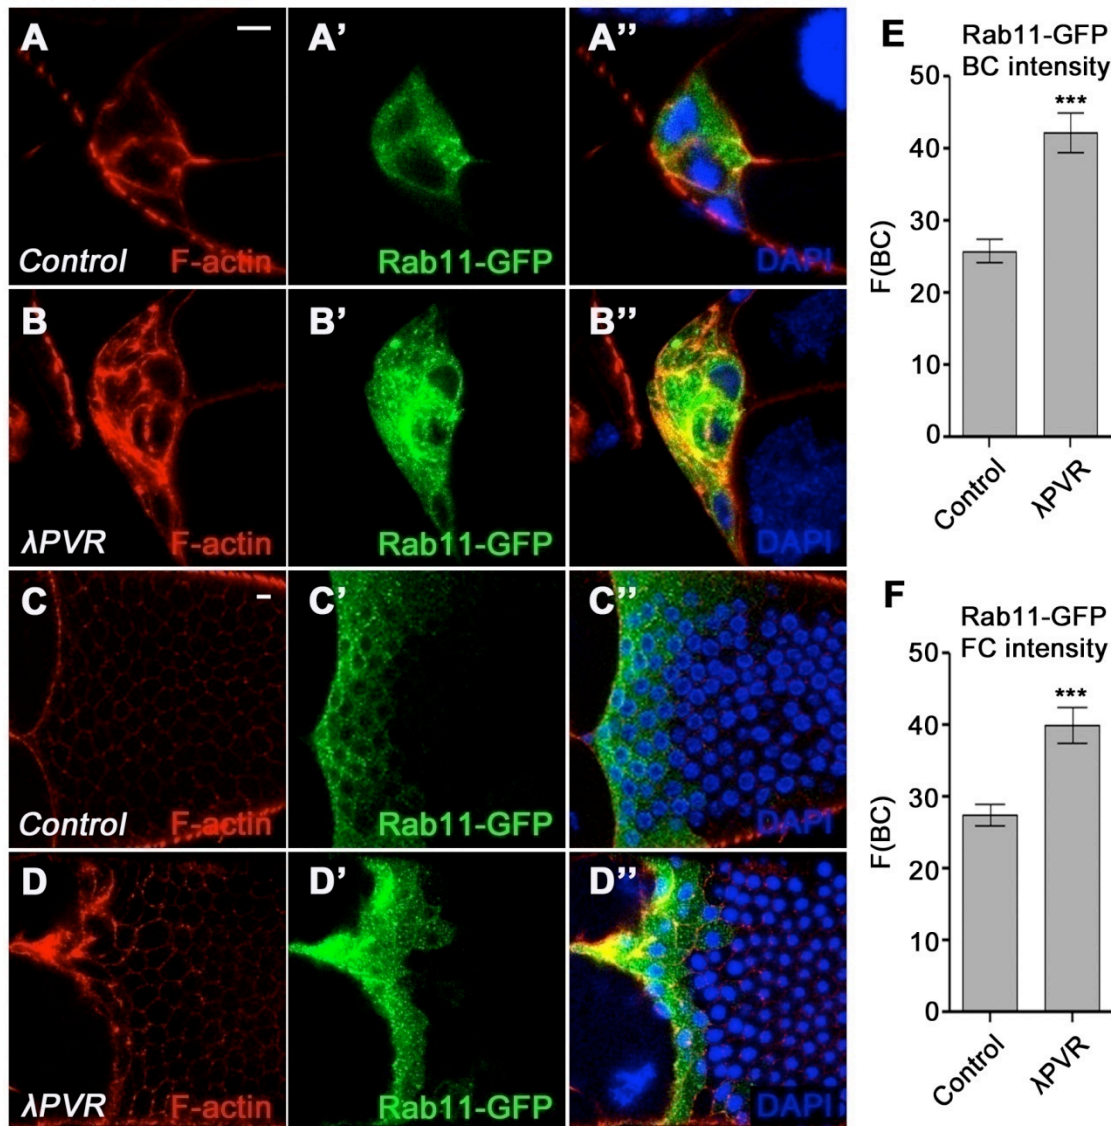

**Figure S6. Rab11-GFP intensity is increased in BCs and FCs expressing  $\lambda$ PVR.**

(A-B'',E) Expressing  $\lambda$ PVR by Slbo-Gal4 increased Rab11-GFP intensity in BCs.

(C-D'',F) Expressing  $\lambda$ PVR by Slbo-Gal4 increased Rab11-GFP intensity in FCs.

Error bars indicate s.e.m. Scale bar: 5 $\mu$ m.

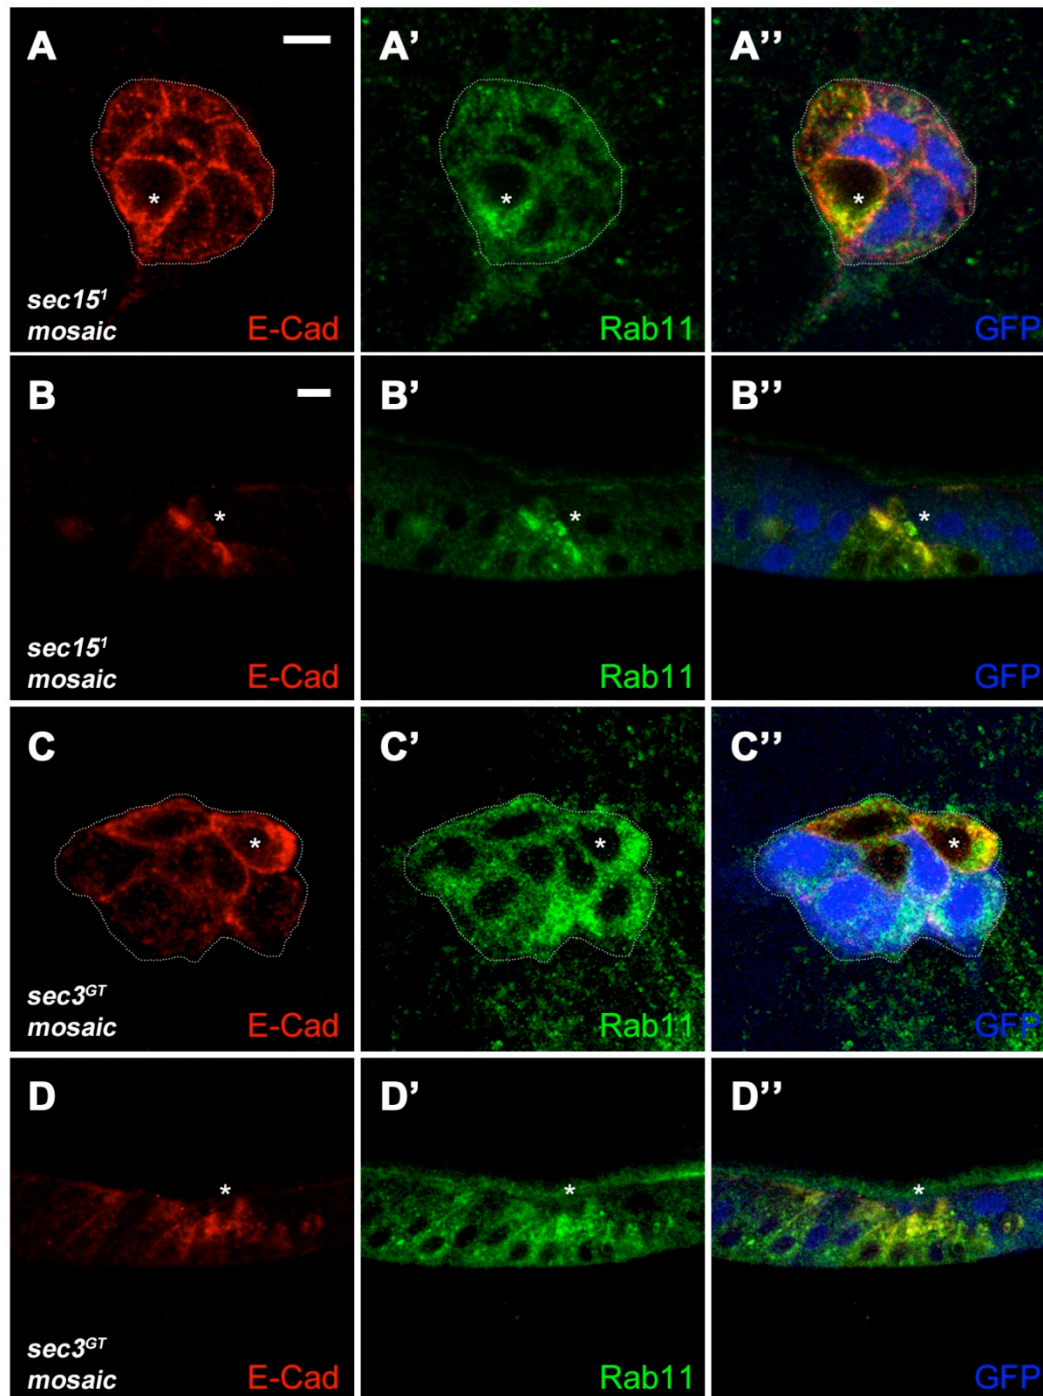

**Figure S7. *sec15* mutant cells display similar phenotypes as *sec3* mutant cells.** (A-B'') E-Cad accumulates in Rab11 marked vesicles in *sec15*<sup>1</sup> (Jafar-Nejad et al., 2005) BCs and FCs. (C-D'') E-Cad accumulates in Rab11 marked vesicles in *sec3*<sup>GT</sup> BCs and FCs. Mutant cells are marked by \* and absence of GFP. Sale bars: 5um.

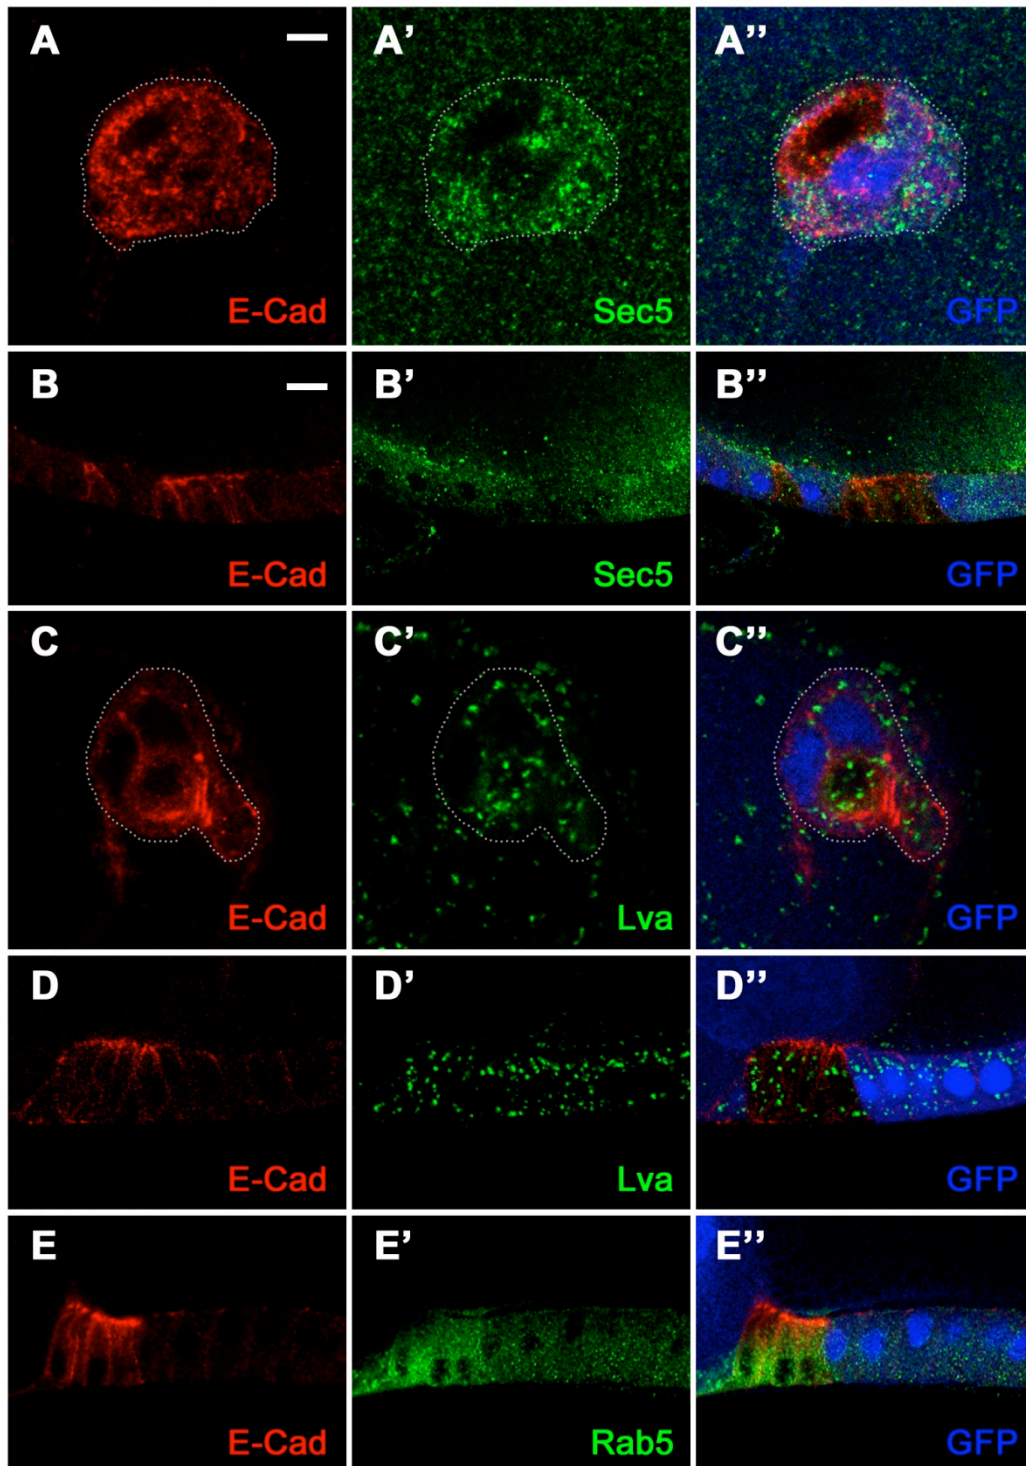

**Figure S8.** E-cad is not detected in other compartments labeled by Lva and **Rab5**. (A-B'') *sec3<sup>GT</sup>* mutant BCs and FCs shows reduced Sec5 signal. (C-D'') *sec3<sup>GT</sup>* mutant BCs and FCs shows normal distribution of Lva staining, which is and not colocalized with elevated E-Cad staining. (E-E'') *sec3<sup>GT</sup>* mutant FCs shows no significant colocalization between Rab5 and E-Cad. The Rab5 signal is elevated in the basal lateral region whereas E-Cad is strongly elevated at the apical cytoplasmic



region. Note that we were unable to obtain good Rab5 stainings in BCs due to antibody penetrability issues. Scale bars: 5µm.
